# Supplementary material for: Pathogenomics Characterization of an Emerging Fungal Pathogen, Fusarium oxysporum f. sp. lycopersici in Greenhouse Tomato Production Systems
Source: Front Microbiol. 2020 Aug 27;11:1995. doi: 10.3389/fmicb.2020.01995 (PMC7482420; doi:10.3389/fmicb.2020.01995)
Supplement: Supplementary file 2 [file Table_2.XLSX]

## Sheet: All_Isolates on BB
Table S4. Comaprisons of virulence of the 38 isolates of Fusarium oxysporum f. sp. lycopersici (FOL) collected from different greenhoses in North carolina and tested on tomato cultivar 'Bonny Best'
Isolate numbersa	AUDPC valuesb	Pathogenic racesc	Greenhouse numbersd	T-groupinge												Greenhouse #
Fu 26	1417.5	3	9	A												Greenhouse 8
Fu 14	1330	3	8	AB												Fu 14
Fu 25	1277.5	3	9	ABC												Fu 20
Fu 32	1277.5	3	10	ABC												Fu 11
Fu 20	1225	3	8	ABCD												Fu 13
Fu 11	1207.5	3	8	ABCDE												Fu 15
Fu 28	1190	3	9	ABCDE												Fu 10
Fu 35	1181.25	3	10	ABCDE												Fu 12
Fu 13	1172.5	3	8	ABCDEF												Fu 21
Fu 15	1120	3	8	BCDEFG												Fu 17
Fu 31	1120	3	9	BCDEFG												Fu 22
Fu 7	1115.62	3	7	BCDEFG												Fu 9
Fu 36	1102.5	3	11	BCDEFG												Fu 18
Fu 24	1067.5	3	9	CDEFG												Fu 19
Fu 3	1054.37	3	3	CDEFG												Fu 16
Fu 5	1050	1	5	CDEFG
Fu 27	1050	3	9	CDEFG
Fu 34	1050	3	10	CDEFG
Fu 10	1032.5	3	8	CDEFG												Greenhouse 9
Fu 33	1032.5	3	10	CDEFG												Fu 26
Fu 12	1015	3	8	CDEFG												Fu 25
Fu 29	1015	3	9	CDEFG												Fu 28
Fu 21	997.5	3	8	DEFG												Fu 31
Fu 30	997.5	3	9	DEFG												Fu 24
Fu 17	971.25	3	8	EFG												Fu 27
Fu 23	945	3	9	EFGH												Fu 29
Fu 22	910	3	8	EFGH												Fu 30
Fu 2	892.5	1	2	GHI												Fu 23
Fu 9	892.5	3	8	GHI
Fu 18	892.5	3	8	GHI												Greenhouse 10
Fu 19	883.75	3	8	GHIJ												Fu 32
Fu 37	875	3	11	GHIJ												Fu 35
Fu 16	717.5	3	8	HIJ												Fu 34
Fu 39	700	1	12	JI												Fu 33
Fu 38	621.25	3	11	J
Fu 4	35	3	4	K
Fu 6	0	3	6	K												Greenhouse 11
Water (Control)	0			K												Fu 36
																Fu 37
																Fu 38
a Thirty-eight isolates of FOL were collected from 12 greenhouses in NC and thier virulence were evalutaed on on tomato cultivars, and by polymerase chain reaction assay and sequencing. Race 3 isolate Fu 1 was not included in analysis due to few plants affected by water stress.
b Disease severities were assessed from 7, 14 and 21 days after inoculation (DAI) and the area under disease progress curve (AUDPC) values were calculated from disease severities.
c Pathogenic races of the isolates of FOL were assessed on four tomato differential cultivars in the greenhouse. Tomato cultivars were Bonny Best (susceptible check), Miracle Sweet (I-1 gene), Red Defender (I-1 and I-2 genes), and Happy Root (I-1, I-2, and I-3 genes) were inoculated with each isolate.
d Isolates of FOL were collected from 12 greenhouses (Fig. 1) in North Carolina.
e Conservative T Grouping for isolate means. Means with the same letter are not significantly different (P = 0.05).
